# Supplementary material for: Identification of VHY/Dusp15 as a Regulator of Oligodendrocyte Differentiation through a Systematic Genomics Approach
Source: PubMed Central journal article supplement (PMC3394735; doi:10.1371/journal.pone.0040457), 2012-07-11
Supplement: pone.0040457.s001.pdf [file pone.0040457.s001.pdf]

Table S1. Validated human and mouse oligonucleotides set for q-PCR quantification  
Set of primers selected for the q-PCR based PTP expression profile

| Mouse phosphatases primer set |               |               |               | Human phosphatases primer set |               |               |               |
|-------------------------------|---------------|---------------|---------------|-------------------------------|---------------|---------------|---------------|
| Synonym                       | Gene          | Reference     | Supplier      | Name                          | Gene          | Reference     | Supplier      |
| MKP1                          | <i>Dusp1</i>  | QT00288638    | Qiagen        | MKP1                          | <i>Dusp1</i>  | QT00036638    | Qiagen        |
| MKP2                          | <i>Dusp4</i>  | QT00140357    | Qiagen        | MKP2                          | <i>Dusp4</i>  | PPH00058A-200 | SABiosciences |
| hVH3                          | <i>Dusp5</i>  | QT01065617    | Qiagen        | hVH3                          | <i>Dusp5</i>  | QT00001337    | Qiagen        |
| PAC1                          | <i>Dusp2</i>  | QT00248283    | Qiagen        | PAC1                          | <i>Dusp2</i>  | PPH00049A-200 | SABiosciences |
| MKP3                          | <i>Dusp6</i>  | QT00101997    | Qiagen        | MKP3                          | <i>Dusp6</i>  | QT00209986    | Qiagen        |
| PYST2                         | <i>Dusp7</i>  | QT00155337    | Qiagen        | PYST2                         | <i>Dusp7</i>  | QT00001988    | Qiagen        |
| MKP5                          | <i>Dusp10</i> | QT00152257    | Qiagen        | MKP4                          | <i>Dusp9</i>  | QT00207326    | Qiagen        |
| hVH5                          | <i>Dusp8</i>  | QT00118650    | Qiagen        | MKP5                          | <i>Dusp10</i> | QT00082117    | Qiagen        |
| MKP7                          | <i>Dusp16</i> | QT00097272    | Qiagen        | hVH5                          | <i>Dusp8</i>  | QT00009212    | Qiagen        |
| MK-Styx                       | <i>Styx11</i> | PPM34884A-200 | SABiosciences | MKP7                          | <i>Dusp16</i> | QT00094178    | Qiagen        |
| VHR                           | <i>Dusp3</i>  | QT00138467    | Qiagen        | MK-Styx                       | <i>Styx11</i> | QT00004032    | Qiagen        |
| MKP8                          | <i>Dusp26</i> | QT00112630    | Qiagen        | VHR                           | <i>Dusp3</i>  | QT00030107    | Qiagen        |
| MKP6                          | <i>Dusp14</i> | QT00284424    | Qiagen        | MKP6                          | <i>Dusp14</i> | QT00203735    | Qiagen        |
| LMW DSP20                     | <i>Dusp18</i> | QT00119322    | Qiagen        | LMW DSP20                     | <i>Dusp18</i> | QT00090202    | Qiagen        |
| SKRP1                         | <i>Dusp19</i> | QT00169624    | Qiagen        | SKRP1                         | <i>Dusp19</i> | QT00023275    | Qiagen        |
| Styx                          | <i>Styx</i>   | QT01531992    | Qiagen        | Styx                          | <i>Styx</i>   | QT00057330    | Qiagen        |
| JSP1                          | <i>Dusp22</i> | QT00158431    | Qiagen        | JSP1                          | <i>Dusp22</i> | QT01023582    | Qiagen        |
| VHY                           | <i>Dusp15</i> | QT00171605    | Qiagen        | VHY                           | <i>Dusp15</i> | PPH18348A-200 | SABiosciences |
| SSH1                          | <i>Ssh1</i>   | QT00165011    | Qiagen        | SSH1                          | <i>Ssh1</i>   | QT00011417    | Qiagen        |
| SSH2                          | <i>Ssh2</i>   | QT00101199    | Qiagen        | SSH2                          | <i>Ssh2</i>   | QT00054852    | Qiagen        |
| SSH3                          | <i>Ssh3</i>   | QT00150227    | Qiagen        | SSH3                          | <i>Ssh3</i>   | QT00007644    | Qiagen        |
| HYVH1                         | <i>Dusp12</i> | QT00124600    | Qiagen        | HYVH1                         | <i>Dusp12</i> | QT00060319    | Qiagen        |
| PTEN                          | <i>Pten</i>   | QT00141568    | Qiagen        | PTEN                          | <i>Pten</i>   | QT01676969    | Qiagen        |
| PRL1                          | <i>Ptp4a1</i> | QT00156464    | Qiagen        | PRL1                          | <i>Ptp4A1</i> | QT00028203    | Qiagen        |
| PRL2                          | <i>Ptp4a2</i> | QT00143332    | Qiagen        | PRL2                          | <i>Ptp4A2</i> | QT00080290    | Qiagen        |
| PRL3                          | <i>Ptp4a3</i> | QT00138243    | Qiagen        | PRL3                          | <i>Ptp4A3</i> | QT00009471    | Qiagen        |
| cdc14a                        | <i>Cdc14a</i> | QT01051764    | Qiagen        | cdc14a                        | <i>Cdc14A</i> | QT00094976    | Qiagen        |
| cdc14b                        | <i>Cdc14b</i> | QT01079148    | Qiagen        | cdc14b                        | <i>Cdc14B</i> | QT00009107    | Qiagen        |
| PIR1                          | <i>Dusp11</i> | QT00104867    | Qiagen        | PIR1                          | <i>Dusp11</i> | QT00004753    | Qiagen        |
| MCE                           | <i>Rngtt</i>  | QT00151564    | Qiagen        | MCE                           | <i>Rngtt</i>  | QT00021623    | Qiagen        |
| LAFORIN                       | <i>Epm2a</i>  | QT00261842    | Qiagen        | LAFORIN                       | <i>Epm2A</i>  | PPH22251A-200 | SABiosciences |
| PTP 9q22                      | <i>Ptpdc1</i> | QT00161973    | Qiagen        | PTP 9q22                      | <i>Ptpdc1</i> | QT00061663    | Qiagen        |
| KAP1                          | <i>Cdkn3</i>  | QT01561763    | Qiagen        | KAP1                          | <i>Cdkn3</i>  | QT00014728    | Qiagen        |
| PTP MT1                       | <i>Ptpmt1</i> | QT00114772    | Qiagen        | PTP MT1                       | <i>Ptpmt1</i> | QT01029448    | Qiagen        |
| VHZ                           | <i>Dusp23</i> | QT01075487    | Qiagen        | VHZ                           | <i>Dusp23</i> | QT00054313    | Qiagen        |
| MTM1                          | <i>Mtm1</i>   | QT01066079    | Qiagen        | MTM1                          | <i>Mtm1</i>   | QT00061565    | Qiagen        |
| MTMR1                         | <i>Mtmr1</i>  | QT00147070    | Qiagen        | MTMR1                         | <i>Mtmr1</i>  | QT00041545    | Qiagen        |
| MTMR2                         | <i>Mtmr2</i>  | QT00144795    | Qiagen        | MTMR2                         | <i>Mtmr2</i>  | QT00034111    | Qiagen        |
| MTMR3                         | <i>Mtmr3</i>  | QT01068655    | Qiagen        | MTMR3                         | <i>Mtmr3</i>  | QT00075488    | Qiagen        |
| MTMR4                         | <i>Mtmr4</i>  | QT00148757    | Qiagen        | MTMR4                         | <i>Mtmr4</i>  | QT00082523    | Qiagen        |
| MTMR6                         | <i>Mtmr6</i>  | QT00147994    | Qiagen        | MTMR6                         | <i>Mtmr6</i>  | QT00076125    | Qiagen        |
| MTMR7                         | <i>Mtmr7</i>  | QT00175868    | Qiagen        | MTMR7                         | <i>Mtmr7</i>  | QT00197519    | Qiagen        |
| MTMR9                         | <i>Mtmr9</i>  | QT00102305    | Qiagen        | MTMR8                         | <i>Mtmr8</i>  | QT00059535    | Qiagen        |
| MTMR11                        | <i>Mtmr11</i> | QT00157318    | Qiagen        | MTMR9                         | <i>Mtmr9</i>  | QT00085421    | Qiagen        |
| MTMR12                        | <i>Mtmr12</i> | QT00132384    | Qiagen        | MTMR11                        | <i>Mtmr11</i> | QT00063742    | Qiagen        |
| MTMR10                        | <i>Mtmr10</i> | QT01067675    | Qiagen        | MTMR12                        | <i>Mtmr12</i> | QT00081830    | Qiagen        |
| MTMR5                         | <i>Sbf1</i>   | QT01549450    | Qiagen        | MTMR10                        | <i>Mtmr10</i> | QT00007833    | Qiagen        |
| MTMR13                        | <i>Sbf2</i>   | QT00125951    | Qiagen        | MTMR5                         | <i>Sbf1</i>   | PPH11198E-200 | SABiosciences |
| TENSIN-1                      | <i>Tns1</i>   | PPM33341A-200 | SABiosciences | MTMR13                        | <i>Sbf2</i>   | QT00056035    | Qiagen        |

|            |                |               |               |            |                |               |               |
|------------|----------------|---------------|---------------|------------|----------------|---------------|---------------|
| TENSIN-3   | <i>Tns3</i>    | QT01557437    | Qiagen        | TENSIN-1   | <i>Tns1</i>    | QT00081627    | Qiagen        |
| TENSIN-2   | <i>Tenc1</i>   | QT01066800    | Qiagen        | TENSIN-3   | <i>Tns3</i>    | QT00081396    | Qiagen        |
| cdc25a     | <i>Cdc25a</i>  | QT01058778    | Qiagen        | TENSIN-2   | <i>Tenc1</i>   | QT00002548    | Qiagen        |
| cdc25b     | <i>Cdc25b</i>  | QT00127806    | Qiagen        | cdc25a     | <i>Cdc25A</i>  | QT00001078    | Qiagen        |
| cdc25c     | <i>Cdc25c</i>  | QT01055222    | Qiagen        | cdc25b     | <i>Cdc25B</i>  | QT00028350    | Qiagen        |
| PTP1B      | <i>Ptpn1</i>   | QT00166418    | Qiagen        | cdc25c     | <i>Cdc25C</i>  | QT00000350    | Qiagen        |
| TCPTP      | <i>Ptpn2</i>   | QT01063573    | Qiagen        | PTP1B      | <i>Ptpn1</i>   | QT01006978    | Qiagen        |
| SHP1       | <i>Ptpn6</i>   | QT00155967    | Qiagen        | TCPTP      | <i>Ptpn2</i>   | PPH21327A-200 | SABiosciences |
| SHP2       | <i>Ptpn11</i>  | QT00103362    | Qiagen        | SHP1       | <i>Ptpn6</i>   | QT00011725    | Qiagen        |
| MEG2       | <i>Ptpn9</i>   | QT00170520    | Qiagen        | SHP2       | <i>Ptpn11</i>  | QT00070336    | Qiagen        |
| PEST       | <i>Ptpn12</i>  | QT00168126    | Qiagen        | MEG2       | <i>Ptpn9</i>   | QT00068579    | Qiagen        |
| LyPTP      | <i>Ptpn22</i>  | QT00103943    | Qiagen        | PEST       | <i>Ptpn12</i>  | QT00011557    | Qiagen        |
| BDP1       | <i>Ptpn18</i>  | QT00097027    | Qiagen        | LyPTP      | <i>Ptpn22</i>  | PPH10382A-200 | SABiosciences |
| MEG1       | <i>Ptpn4</i>   | PPM35219A-200 | SABiosciences | BDP1       | <i>Ptpn18</i>  | QT00089257    | Qiagen        |
| PTPH1      | <i>Ptpn3</i>   | QT00264649    | Qiagen        | MEG1       | <i>Ptpn4</i>   | QT00076503    | Qiagen        |
| PTPD1      | <i>Ptpn21</i>  | QT00197862    | Qiagen        | PTPH1      | <i>Ptpn3</i>   | QT00067249    | Qiagen        |
| PEZ        | <i>Ptpn14</i>  | QT00107674    | Qiagen        | PTPD1      | <i>Ptpn21</i>  | QT00065100    | Qiagen        |
| PTPBAS     | <i>Ptpn13</i>  | QT00097244    | Qiagen        | PEZ        | <i>Ptpn14</i>  | QT00005600    | Qiagen        |
| PTPTyp     | <i>Ptpn20</i>  | PPM25464A-200 | SABiosciences | PTPBAS     | <i>Ptpn13</i>  | QT00054446    | Qiagen        |
| HDPTP      | <i>Ptpn23</i>  | QT01560692    | Qiagen        | HDPTP      | <i>Ptpn23</i>  | PPH08613B-200 | SABiosciences |
| HePTP      | <i>Ptpn7</i>   | QT01073611    | Qiagen        | HePTP      | <i>Ptpn7</i>   | QT00063413    | Qiagen        |
| CD45       | <i>Ptpnc</i>   | QT00139405    | Qiagen        | CD45       | <i>Ptpnc</i>   | QT00028791    | Qiagen        |
| LAR        | <i>Ptpnf</i>   | PPM05105E-200 | SABiosciences | LAR        | <i>Ptpnf</i>   | QT00041062    | Qiagen        |
| PTPdelta   | <i>Ptpnd</i>   | QT01167180    | Qiagen        | PTPdelta   | <i>Ptpnd</i>   | QT00059640    | Qiagen        |
| PTPsigma   | <i>Ptpns</i>   | QT00150416    | Qiagen        | PTPsigma   | <i>Ptpns</i>   | QT00063504    | Qiagen        |
| PTPkappa   | <i>Ptpnk</i>   | QT01063615    | Qiagen        | PTPkappa   | <i>Ptpnk</i>   | QT00031080    | Qiagen        |
| PTPmu      | <i>Ptpnm</i>   | QT00167545    | Qiagen        | PTPmu      | <i>Ptpnm</i>   | QT00010199    | Qiagen        |
| PTPrho     | <i>Ptpnr</i>   | QT01063594    | Qiagen        | PTPrho     | <i>Ptpnr</i>   | QT00097923    | Qiagen        |
| PTPS31     | <i>Ptpnrq</i>  | QT01077237    | Qiagen        | PTPlambda  | <i>Ptpnr</i>   | QT00005677    | Qiagen        |
| GLEPP1     | <i>Ptpnrp</i>  | QT00134540    | Qiagen        | PTPS31     | <i>Ptpnrq</i>  | QT01150597    | Qiagen        |
| PTPbeta    | <i>Ptpnrb</i>  | QT00197981    | Qiagen        | GLEPP1     | <i>Ptpnrp</i>  | QT00037695    | Qiagen        |
| DEP1       | <i>Ptpnrj</i>  | QT00169785    | Qiagen        | PTPbeta    | <i>Ptpnrb</i>  | QT00054411    | Qiagen        |
| SAP1       | <i>Ptpnrh</i>  | QT01059415    | Qiagen        | DEP1       | <i>Ptpnrj</i>  | QT00043876    | Qiagen        |
| PTPalpha   | <i>Ptpnra</i>  | QT00141610    | Qiagen        | SAP1       | <i>Ptpnrh</i>  | PPH13725A-200 | SABiosciences |
| PTPepsilon | <i>Ptpnre</i>  | QT00101941    | Qiagen        | PTPalpha   | <i>Ptpnra</i>  | QT00494480    | Qiagen        |
| PTPgamma   | <i>Ptpnrg</i>  | QT00160832    | Qiagen        | PTPepsilon | <i>Ptpnre</i>  | QT00021567    | Qiagen        |
| PTPzeta    | <i>Ptpnrz1</i> | QT01057854    | Qiagen        | PTPgamma   | <i>Ptpnrg</i>  | QT00060116    | Qiagen        |
| PCPTP1     | <i>Ptpnrr</i>  | QT00173530    | Qiagen        | PTPzeta    | <i>Ptpnrz1</i> | QT00083300    | Qiagen        |
| STEP       | <i>Ptpn5</i>   | QT01063580    | Qiagen        | PCPTP1     | <i>Ptpnrr</i>  | PPH14225A-200 | SABiosciences |
| IA2        | <i>Ptpnrn</i>  | QT01063608    | Qiagen        | STEP       | <i>Ptpn5</i>   | QT00013909    | Qiagen        |
| IA2beta    | <i>Ptpnrn2</i> | QT01057868    | Qiagen        | IA2        | <i>Ptpnrn</i>  | QT00015421    | Qiagen        |
| PTPESP     | <i>Ptpnrp</i>  | QT01070930    | Qiagen        | IA2beta    | <i>Ptpnrn2</i> | QT00074375    | Qiagen        |
| LMW PTP    | <i>Acp1</i>    | QT00135135    | Qiagen        | LMW PTP    | <i>Acp1</i>    | QT00022820    | Qiagen        |
