# Supplementary material for: Identification of VHY/Dusp15 as a Regulator of Oligodendrocyte Differentiation through a Systematic Genomics Approach
Source: PubMed Central journal article supplement (PMC3394735; doi:10.1371/journal.pone.0040457), 2012-07-11
Supplement: pone.0040457.s002.pdf [file pone.0040457.s002.pdf]

Table S2. Differential gene expression of PTP family members in MS white matter lesions

|        | WML vs CWM |        |        | WML vs NAWM |        |        | NAWM vs CWM |        |
|--------|------------|--------|--------|-------------|--------|--------|-------------|--------|
|        | Fold       | Pvalue |        | Fold        | Pvalue |        | Fold        | Pvalue |
| PTPN18 | -15.47     | 0.004  | PTPN18 | -14.15      | 0.019  | DUSP2  | -3.30       | 0.009  |
| DUSP1  | -6.97      | 0.001  | DUSP1  | -5.82       | 0.000  | DUSP6  | -2.67       | 0.003  |
| PTP4A2 | -5.82      | 0.001  | MTMR10 | -5.30       | 0.002  | PTPN7  | -2.18       | 0.115  |
| SSH3   | -5.46      | 0.007  | SSH3   | -4.87       | 0.001  | PTPN22 | -2.11       | 0.032  |
| DUSP22 | -4.77      | 0.002  | DUSP22 | -3.93       | 0.002  | PTPN1  | -1.97       | 0.141  |
| MTMR7  | -4.51      | 0.002  | DUSP11 | -3.70       | 0.013  | PTP4A2 | -1.79       | 0.002  |
| PTPRD  | -4.12      | 0.001  | PTP4A2 | -3.25       | 0.001  | PTPRE  | -1.68       | 0.022  |
| MTMR10 | -4.08      | 0.000  | PTPN14 | -3.03       | 0.042  | PTPN6  | -1.67       | 0.044  |
| DUSP11 | -3.71      | 0.006  | PTPRD  | -3.02       | 0.003  | DUSP5  | -1.65       | 0.008  |
| DUSP5  | -3.69      | 0.016  | MTMR2  | -2.86       | 0.016  | MTMR7  | -1.61       | 0.010  |
| PTPN13 | -3.55      | 0.011  | MTMR7  | -2.80       | 0.002  | PTPRC  | -1.60       | 0.090  |
| PTPN14 | -3.31      | 0.008  | PTPRZ1 | -2.63       | 0.008  | MTMR8  | -1.57       | 0.089  |
| PTPN1  | -3.18      | 0.133  | DUSP3  | -2.62       | 0.004  | PTPRH  | -1.56       | 0.097  |
| PTPN11 | -3.16      | 0.001  | MTMR12 | -2.60       | 0.003  | DUSP15 | -1.54       | 0.048  |
| MTM1   | -2.69      | 0.000  | MTM1   | -2.42       | 0.037  | PTP4A3 | -1.53       | 0.006  |
| PTPRC  | -2.67      | 0.096  | PTPN11 | -2.38       | 0.002  | PTPN13 | -1.50       | 0.071  |
| PTPRZ1 | -2.59      | 0.001  | PTPN13 | -2.37       | 0.005  | PTPRQ2 | -1.48       | 0.128  |
| SSH2   | -2.47      | 0.014  | PTPRU  | -2.25       | 0.046  | MTMR11 | -1.45       | 0.075  |
| MTMR12 | -2.43      | 0.004  | DUSP5  | -2.24       | 0.032  | hEPM2A | -1.38       | 0.051  |
| MTMR2  | -2.39      | 0.007  | PTPRJ  | -2.23       | 0.053  | PTPRD  | -1.36       | 0.019  |
| DUSP16 | -2.34      | 0.012  | PTPRF  | -2.20       | 0.007  | PTPN11 | -1.33       | 0.012  |
| PTP4A1 | -2.27      | 0.013  | DUSP16 | -2.03       | 0.025  | PTPDC1 | -1.30       | 0.026  |
| PTPRF  | -2.08      | 0.012  | SSH2   | -2.00       | 0.018  | hRNGTT | -1.27       | 0.006  |
| PTPRU  | -1.92      | 0.072  | DUSP10 | -1.93       | 0.031  | SSH2   | -1.23       | 0.009  |
| PTPRJ  | -1.92      | 0.037  | PTP4A1 | -1.90       | 0.032  | CDC14b | -1.23       | 0.186  |
| TNS1   | -1.88      | 0.010  | TNS1   | -1.79       | 0.003  | CDKN3  | -1.23       | 0.328  |
| DUSP3  | -1.82      | 0.005  | PTPRC  | -1.67       | 0.105  | PTPMT1 | -1.22       | 0.020  |
| DUSP10 | -1.76      | 0.060  | MTMR4  | -1.67       | 0.017  | DUSP22 | -1.21       | 0.052  |
| SBF2   | -1.71      | 0.003  | PTPRK  | -1.65       | 0.024  | DUSP1  | -1.20       | 0.016  |
| MTMR4  | -1.69      | 0.004  | PTPN1  | -1.61       | 0.112  | PTP4A1 | -1.20       | 0.074  |
| PTPMT1 | -1.54      | 0.009  | SBF2   | -1.60       | 0.021  | PTPN12 | -1.19       | 0.165  |
| PTPRA  | -1.54      | 0.000  | DUSP7  | -1.57       | 0.017  | DUSP9  | -1.17       | 0.271  |
| CDC14A | -1.39      | 0.215  | PTPRA  | -1.49       | 0.007  | STYXL1 | -1.17       | 0.137  |
| PTPN4  | -1.35      | 0.119  | PTPN23 | -1.47       | 0.108  | CDC14A | -1.16       | 0.154  |
| STYXL1 | -1.27      | 0.119  | PTPRB  | -1.43       | 0.121  | DUSP4  | -1.15       | 0.210  |
| PTPRK  | -1.24      | 0.052  | PTPN4  | -1.36       | 0.051  | DUSP16 | -1.15       | 0.231  |
| MTMR6  | -1.22      | 0.282  | STYX   | -1.29       | 0.018  | TENC1  | -1.15       | 0.079  |
| DUSP7  | -1.19      | 0.164  | MTMR6  | -1.29       | 0.146  | SSH3   | -1.12       | 0.190  |
| PTPRE  | -1.17      | 0.123  | PTPMT1 | -1.27       | 0.036  | MTM1   | -1.11       | 0.287  |
| PTPDC1 | -1.15      | 0.047  | PTPRO  | -1.23       | 0.122  | PTPN14 | -1.09       | 0.246  |
| STYX   | -1.11      | 0.008  | MTMR1  | -1.22       | 0.052  | PTPN18 | -1.09       | 0.371  |
| MTMR1  | -1.08      | 0.362  | CDC14A | -1.20       | 0.272  | DUSP12 | -1.07       | 0.263  |
| PTPRB  | -1.07      | 0.408  | SSH1   | -1.13       | 0.181  | ACPI   | -1.07       | 0.315  |
| MTMR9  | -1.06      | 0.406  | STYXL1 | -1.09       | 0.301  | SBF2   | -1.07       | 0.192  |
| PTEN   | -1.02      | 0.467  | PTEN   | -1.08       | 0.117  | TNS1   | -1.05       | 0.206  |
| PTPN12 | 1.04       | 0.411  | PTPN21 | -1.06       | 0.272  | CDC25A | -1.05       | 0.471  |
| PTPRO  | 1.10       | 0.280  | MTMR9  | -1.05       | 0.367  | PTPRA  | -1.04       | 0.203  |
| PTPRS  | 1.17       | 0.126  | PTPRS  | 1.00        | 0.481  | MTMR4  | -1.01       | 0.402  |
| SBF1   | 1.19       | 0.144  | SBF1   | 1.10        | 0.173  | MTMR9  | -1.01       | 0.474  |

|               |        |       |               |        |       |               |       |       |
|---------------|--------|-------|---------------|--------|-------|---------------|-------|-------|
| <b>PTPN23</b> | 1.20   | 0.184 | <b>TNS3</b>   | 1.12   | 0.249 | <b>DUSP11</b> | -1.00 | 0.488 |
| <b>CDKN3</b>  | 1.23   | 0.298 | <b>PTPDC1</b> | 1.13   | 0.161 | <b>PTPRG</b>  | 1.00  | 0.481 |
| <b>PTPRG</b>  | 1.26   | 0.012 | <b>PTPRN</b>  | 1.19   | 0.279 | <b>PTPN4</b>  | 1.01  | 0.475 |
| <b>SSH1</b>   | 1.28   | 0.151 | <b>PTPN12</b> | 1.24   | 0.066 | <b>PTPRZ1</b> | 1.01  | 0.411 |
| <b>hRNGTT</b> | 1.34   | 0.098 | <b>PTPRG</b>  | 1.25   | 0.017 | <b>PTPRM</b>  | 1.02  | 0.433 |
| <b>CDC14b</b> | 1.54   | 0.049 | <b>PTPRE</b>  | 1.43   | 0.001 | <b>MTMR3</b>  | 1.03  | 0.291 |
| <b>PTPN21</b> | 1.55   | 0.108 | <b>CDKN3</b>  | 1.51   | 0.183 | <b>MTMR6</b>  | 1.06  | 0.332 |
| <b>TNS3</b>   | 1.72   | 0.078 | <b>hRNGTT</b> | 1.71   | 0.049 | <b>PTPRF</b>  | 1.06  | 0.175 |
| <b>MTMR3</b>  | 1.83   | 0.069 | <b>MTMR3</b>  | 1.78   | 0.061 | <b>PTEN</b>   | 1.06  | 0.343 |
| <b>PTPRN</b>  | 1.90   | 0.053 | <b>CDC25B</b> | 1.85   | 0.021 | <b>MTMR12</b> | 1.07  | 0.279 |
| <b>DUSP12</b> | 2.29   | 0.015 | <b>CDC14b</b> | 1.89   | 0.153 | <b>SBF1</b>   | 1.08  | 0.106 |
| <b>CDC25B</b> | 2.31   | 0.028 | <b>PTPN9</b>  | 2.35   | 0.026 | <b>DUSP10</b> | 1.09  | 0.038 |
| <b>CDC25A</b> | 2.35   | 0.317 | <b>DUSP12</b> | 2.46   | 0.021 | <b>PTPN2</b>  | 1.10  | 0.277 |
| <b>TENC1</b>  | 2.57   | 0.004 | <b>CDC25A</b> | 2.46   | 0.194 | <b>PTPN3</b>  | 1.12  | 0.077 |
| <b>PTPN9</b>  | 2.92   | 0.015 | <b>DUSP23</b> | 2.72   | 0.030 | <b>MTMR1</b>  | 1.13  | 0.309 |
| <b>DUSP2</b>  | 3.07   | 0.051 | <b>PTPRT</b>  | 2.76   | 0.034 | <b>PTPRN2</b> | 1.14  | 0.055 |
| <b>hEPM2A</b> | 3.08   | 0.011 | <b>DUSP14</b> | 2.78   | 0.007 | <b>PTPRJ</b>  | 1.16  | 0.251 |
| <b>DUSP14</b> | 3.48   | 0.004 | <b>TENC1</b>  | 2.96   | 0.004 | <b>STYX</b>   | 1.16  | 0.030 |
| <b>PTPN7</b>  | 3.61   | 0.321 | <b>DUSP8</b>  | 3.18   | 0.012 | <b>PTPRS</b>  | 1.16  | 0.107 |
| <b>DUSP23</b> | 4.07   | 0.020 | <b>CDC25C</b> | 3.21   | 0.224 | <b>PTPRU</b>  | 1.17  | 0.061 |
| <b>CDC25C</b> | 4.38   | 0.102 | <b>PTPN2</b>  | 4.17   | 0.004 | <b>MTMR2</b>  | 1.20  | 0.063 |
| <b>PTP4A3</b> | 4.41   | 0.001 | <b>hEPM2A</b> | 4.26   | 0.005 | <b>PTPN9</b>  | 1.24  | 0.048 |
| <b>DUSP8</b>  | 4.47   | 0.017 | <b>PTPN3</b>  | 4.73   | 0.003 | <b>DUSP14</b> | 1.25  | 0.055 |
| <b>PTPN2</b>  | 4.57   | 0.007 | <b>ACP1</b>   | 4.91   | 0.029 | <b>CDC25B</b> | 1.25  | 0.065 |
| <b>ACP1</b>   | 4.58   | 0.034 | <b>PTPN5</b>  | 4.97   | 0.005 | <b>MTMR10</b> | 1.30  | 0.017 |
| <b>PTPN3</b>  | 5.29   | 0.002 | <b>DUSP18</b> | 5.19   | 0.034 | <b>DUSP7</b>  | 1.33  | 0.026 |
| <b>PTPRT</b>  | 5.52   | 0.021 | <b>PTPRN2</b> | 6.20   | 0.001 | <b>PTPRK</b>  | 1.33  | 0.031 |
| <b>DUSP6</b>  | 5.88   | 0.014 | <b>PTP4A3</b> | 6.77   | 0.000 | <b>PTPRB</b>  | 1.35  | 0.006 |
| <b>DUSP4</b>  | 6.13   | 0.011 | <b>DUSP4</b>  | 7.07   | 0.008 | <b>PTPRO</b>  | 1.36  | 0.013 |
| <b>PTPRH</b>  | 6.58   | 0.008 | <b>PTPRM</b>  | 7.34   | 0.006 | <b>CDC25C</b> | 1.36  | 0.499 |
| <b>PTPRN2</b> | 7.09   | 0.001 | <b>PTPN7</b>  | 7.85   | 0.265 | <b>DUSP8</b>  | 1.41  | 0.066 |
| <b>PTPRM</b>  | 7.45   | 0.007 | <b>PTPRR</b>  | 9.55   | 0.008 | <b>DUSP3</b>  | 1.44  | 0.024 |
| <b>PTPN5</b>  | 8.00   | 0.005 | <b>DUSP2</b>  | 10.13  | 0.024 | <b>SSH1</b>   | 1.45  | 0.033 |
| <b>DUSP15</b> | 8.51   | 0.001 | <b>PTPRH</b>  | 10.27  | 0.007 | <b>DUSP23</b> | 1.50  | 0.009 |
| <b>DUSP18</b> | 9.86   | 0.025 | <b>DUSP15</b> | 13.10  | 0.001 | <b>PTPRR</b>  | 1.53  | 0.068 |
| <b>PTPRR</b>  | 14.62  | 0.009 | <b>DUSP6</b>  | 15.69  | 0.010 | <b>TNS3</b>   | 1.53  | 0.042 |
| <b>DUSP9</b>  | 26.43  | 0.008 | <b>DUSP9</b>  | 30.83  | 0.008 | <b>PTPRN</b>  | 1.60  | 0.020 |
| <b>PTPN22</b> | 37.12  | 0.057 | <b>PTPN22</b> | 78.50  | 0.055 | <b>PTPN5</b>  | 1.61  | 0.005 |
| <b>PTPRQ2</b> | 164.27 | 0.012 | <b>PTPRQ2</b> | 243.77 | 0.012 | <b>DUSP19</b> | 1.64  | 0.043 |
| <b>DUSP19</b> | ND     | ND    | <b>DUSP19</b> | ND     | ND    | <b>PTPN21</b> | 1.65  | 0.033 |
| <b>MTMR8</b>  | ND     | ND    | <b>MTMR8</b>  | ND     | ND    | <b>PTPN23</b> | 1.76  | 0.105 |
| <b>MTMR11</b> | ND     | ND    | <b>MTMR11</b> | ND     | ND    | <b>DUSP18</b> | 1.90  | 0.020 |
| <b>PTPN6</b>  | ND     | ND    | <b>PTPN6</b>  | ND     | ND    | <b>PTPRT</b>  | 2.00  | 0.002 |

ND: Non Determined; WML: White Matter lesioned; CWM: Control White Matter; NAWM: Normal-appearing White Matter
