# Supplementary material for: Identification of VHY/Dusp15 as a Regulator of Oligodendrocyte Differentiation through a Systematic Genomics Approach
Source: PubMed Central journal article supplement (PMC3394735; doi:10.1371/journal.pone.0040457), 2012-07-11
Supplement: pone.0040457.s003.pdf [file pone.0040457.s003.pdf]

Table S3. Differential gene expression of PTP family members in MS grey matter lesions

|        | GML vs CGM |        |        | GML vs NAGM |        |        | NAGM vs CGM |        |
|--------|------------|--------|--------|-------------|--------|--------|-------------|--------|
|        | Fold       | Pvalue |        | Fold        | Pvalue |        | Fold        | Pvalue |
| DUSP2  | -7.79      | 0.000  | CDC25C | -5.25       | 0.007  | DUSP1  | -5.65       | 0.003  |
| CDC25C | -4.66      | 0.317  | DUSP2  | -1.99       | 0.003  | DUSP5  | -4.94       | 0.005  |
| DUSP6  | -3.31      | 0.011  | MTMR7  | -1.69       | 0.006  | DUSP2  | -3.91       | 0.000  |
| CDKN3  | -2.80      | 0.078  | DUSP4  | -1.59       | 0.017  | DUSP6  | -3.36       | 0.010  |
| DUSP4  | -2.77      | 0.010  | DUSP12 | -1.56       | 0.009  | TENC1  | -2.25       | 0.009  |
| DUSP5  | -2.47      | 0.013  | ACP1   | -1.49       | 0.007  | PTPRD  | -2.21       | 0.022  |
| DUSP1  | -1.68      | 0.011  | CDKN3  | -1.43       | 0.270  | PTPN18 | -2.15       | 0.101  |
| PTP4A3 | -1.67      | 0.031  | MTMR4  | -1.42       | 0.006  | PTP4A3 | -2.04       | 0.003  |
| PTP4A1 | -1.42      | 0.011  | PTPRR  | -1.35       | 0.013  | DUSP18 | -1.98       | 0.018  |
| MTMR11 | -1.38      | 0.099  | PTP4A1 | -1.34       | 0.001  | CDKN3  | -1.96       | 0.025  |
| PTPN5  | -1.35      | 0.060  | PTPRN  | -1.34       | 0.010  | PTPN7  | -1.91       | 0.299  |
| PTP4A2 | -1.35      | 0.043  | PTPN1  | -1.31       | 0.139  | PTPN6  | -1.86       | 0.022  |
| PTPN3  | -1.34      | 0.051  | MTMR1  | -1.29       | 0.028  | CDC14b | -1.85       | 0.092  |
| PTPN1  | -1.29      | 0.255  | PTPRO  | -1.28       | 0.009  | DUSP8  | -1.79       | 0.003  |
| DUSP12 | -1.29      | 0.130  | DUSP11 | -1.23       | 0.050  | PTPN3  | -1.79       | 0.034  |
| PTPRN  | -1.23      | 0.055  | PTPDC1 | -1.09       | 0.212  | PTPN22 | -1.76       | 0.044  |
| MTMR8  | -1.23      | 0.124  | PTPRH  | -1.07       | 0.419  | CDC14A | -1.76       | 0.010  |
| PTPRN2 | -1.18      | 0.086  | PTPRQ2 | -1.06       | 0.094  | DUSP4  | -1.74       | 0.029  |
| MTMR7  | -1.16      | 0.102  | MTMR2  | -1.05       | 0.012  | DUSP15 | -1.72       | 0.042  |
| DUSP14 | -1.10      | 0.275  | PTPN4  | -1.05       | 0.190  | TNS1   | -1.70       | 0.015  |
| PTPN6  | -1.10      | 0.344  | DUSP10 | -1.03       | 0.443  | PTPN12 | -1.69       | 0.020  |
| MTMR9  | -1.07      | 0.342  | DUSP19 | -1.01       | 0.467  | PTPRS  | -1.67       | 0.004  |
| MTMR4  | -1.06      | 0.056  | DUSP3  | -1.00       | 0.494  | PTP4A2 | -1.64       | 0.024  |
| PTPRH  | -1.04      | 0.474  | DUSP22 | 1.00        | 0.497  | SBF2   | -1.53       | 0.004  |
| CDC14b | -1.03      | 0.460  | SSH2   | 1.01        | 0.393  | PTPRZ1 | -1.52       | 0.041  |
| CDC25A | -1.03      | 0.485  | DUSP6  | 1.02        | 0.244  | MTMR11 | -1.51       | 0.032  |
| PTPN11 | -1.03      | 0.284  | MTMR6  | 1.06        | 0.270  | hEPM2A | -1.47       | 0.007  |
| PTPMT1 | -1.02      | 0.391  | DUSP14 | 1.07        | 0.264  | PTPN5  | -1.46       | 0.038  |
| PTPDC1 | -1.01      | 0.467  | PTEN   | 1.07        | 0.181  | TNS3   | -1.45       | 0.006  |
| DUSP15 | -1.00      | 0.495  | PTPN5  | 1.08        | 0.066  | MTMR3  | -1.43       | 0.001  |
| DUSP3  | 1.01       | 0.416  | MTMR8  | 1.08        | 0.388  | PTPRG  | -1.43       | 0.054  |
| PTPRZ1 | 1.03       | 0.212  | MTMR11 | 1.09        | 0.314  | PTPN21 | -1.43       | 0.045  |
| hEPM2A | 1.03       | 0.362  | PTPRA  | 1.11        | 0.040  | DUSP23 | -1.42       | 0.022  |
| MTMR1  | 1.03       | 0.302  | PTPN11 | 1.13        | 0.045  | DUSP9  | -1.37       | 0.216  |
| PTPRR  | 1.04       | 0.367  | PTPMT1 | 1.13        | 0.029  | PTPRM  | -1.37       | 0.016  |
| PTPRO  | 1.04       | 0.389  | MTMR9  | 1.14        | 0.040  | PTPRN2 | -1.37       | 0.033  |
| SBF2   | 1.06       | 0.220  | PTPRN2 | 1.15        | 0.061  | PTPN13 | -1.36       | 0.095  |
| PTPRG  | 1.11       | 0.112  | hRNGTT | 1.19        | 0.050  | PTPN9  | -1.34       | 0.102  |
| PTPRM  | 1.11       | 0.129  | CDC25A | 1.19        | 0.345  | MTMR8  | -1.33       | 0.181  |
| MTMR6  | 1.12       | 0.077  | DUSP7  | 1.20        | 0.022  | PTPRJ  | -1.31       | 0.028  |
| PTPRQ2 | 1.13       | 0.247  | PTP4A2 | 1.21        | 0.026  | PTPRT  | -1.27       | 0.062  |
| SSH3   | 1.15       | 0.105  | PTPN2  | 1.22        | 0.115  | STYXL1 | -1.24       | 0.036  |
| PTPN22 | 1.15       | 0.373  | PTP4A3 | 1.22        | 0.114  | CDC25A | -1.23       | 0.344  |
| PTPRE  | 1.15       | 0.069  | PTPN23 | 1.25        | 0.109  | MTMR9  | -1.22       | 0.201  |
| PTEN   | 1.16       | 0.028  | CDC25B | 1.25        | 0.031  | SSH3   | -1.19       | 0.030  |
| MTMR12 | 1.18       | 0.027  | PTPRE  | 1.27        | 0.045  | PTPRU  | -1.19       | 0.142  |
| DUSP10 | 1.18       | 0.247  | PTPN14 | 1.29        | 0.034  | DUSP14 | -1.18       | 0.160  |
| ACP1   | 1.18       | 0.119  | MTMR12 | 1.32        | 0.003  | PTPN11 | -1.16       | 0.033  |
| PTPRJ  | 1.19       | 0.064  | PTPN3  | 1.33        | 0.015  | PTPMT1 | -1.16       | 0.041  |
| PTPN23 | 1.19       | 0.077  | DUSP16 | 1.34        | 0.060  | SBF1   | -1.14       | 0.110  |

|               |       |       |               |      |       |               |       |       |
|---------------|-------|-------|---------------|------|-------|---------------|-------|-------|
| <b>PTPRA</b>  | 1.22  | 0.011 | <b>SSH1</b>   | 1.37 | 0.048 | <b>MTMR12</b> | -1.12 | 0.099 |
| <b>DUSP22</b> | 1.22  | 0.040 | <b>SSH3</b>   | 1.37 | 0.008 | <b>PTPRE</b>  | -1.10 | 0.149 |
| <b>hRNGTT</b> | 1.23  | 0.091 | <b>PTPRC</b>  | 1.38 | 0.109 | <b>PTP4A1</b> | -1.05 | 0.162 |
| <b>STYXL1</b> | 1.23  | 0.027 | <b>PTPRF</b>  | 1.40 | 0.001 | <b>PTPN23</b> | -1.04 | 0.306 |
| <b>DUSP11</b> | 1.24  | 0.110 | <b>SBF1</b>   | 1.45 | 0.015 | <b>PTPRF</b>  | -1.04 | 0.284 |
| <b>SSH2</b>   | 1.25  | 0.074 | <b>STYX</b>   | 1.46 | 0.007 | <b>PTPRC</b>  | -1.00 | 0.427 |
| <b>PTPN13</b> | 1.26  | 0.068 | <b>hEPM2A</b> | 1.51 | 0.007 | <b>MTM1</b>   | 1.00  | 0.500 |
| <b>PTPN18</b> | 1.27  | 0.182 | <b>PTPRM</b>  | 1.53 | 0.003 | <b>PTPN1</b>  | 1.01  | 0.469 |
| <b>SBF1</b>   | 1.27  | 0.008 | <b>STYXL1</b> | 1.53 | 0.012 | <b>DUSP3</b>  | 1.01  | 0.358 |
| <b>PTPN4</b>  | 1.28  | 0.079 | <b>PTPRJ</b>  | 1.56 | 0.041 | <b>PTPRK</b>  | 1.02  | 0.455 |
| <b>PTPN9</b>  | 1.28  | 0.057 | <b>PTPRZ1</b> | 1.56 | 0.024 | <b>PTPRH</b>  | 1.03  | 0.484 |
| <b>PTPRD</b>  | 1.28  | 0.115 | <b>PTPRK</b>  | 1.57 | 0.007 | <b>hRNGTT</b> | 1.04  | 0.405 |
| <b>PTPRS</b>  | 1.29  | 0.041 | <b>PTPRG</b>  | 1.59 | 0.006 | <b>CDC25B</b> | 1.04  | 0.315 |
| <b>DUSP8</b>  | 1.29  | 0.008 | <b>SBF2</b>   | 1.63 | 0.005 | <b>MTMR6</b>  | 1.05  | 0.195 |
| <b>CDC25B</b> | 1.30  | 0.033 | <b>PTPRT</b>  | 1.67 | 0.010 | <b>STYX</b>   | 1.06  | 0.372 |
| <b>DUSP7</b>  | 1.31  | 0.019 | <b>MTM1</b>   | 1.67 | 0.064 | <b>PTPDC1</b> | 1.07  | 0.257 |
| <b>PTPRT</b>  | 1.32  | 0.020 | <b>PTPN6</b>  | 1.69 | 0.037 | <b>PTEN</b>   | 1.08  | 0.188 |
| <b>PTPRF</b>  | 1.35  | 0.015 | <b>DUSP15</b> | 1.71 | 0.044 | <b>PTPRN</b>  | 1.09  | 0.216 |
| <b>PTPRC</b>  | 1.37  | 0.100 | <b>PTPN9</b>  | 1.72 | 0.002 | <b>DUSP7</b>  | 1.09  | 0.207 |
| <b>DUSP18</b> | 1.38  | 0.063 | <b>MTMR10</b> | 1.72 | 0.005 | <b>PTPRA</b>  | 1.10  | 0.054 |
| <b>MTMR2</b>  | 1.38  | 0.032 | <b>PTPN13</b> | 1.72 | 0.023 | <b>CDC25C</b> | 1.13  | 0.431 |
| <b>PTPN7</b>  | 1.47  | 0.287 | <b>CDC14b</b> | 1.79 | 0.034 | <b>DUSP16</b> | 1.15  | 0.074 |
| <b>PTPN2</b>  | 1.52  | 0.009 | <b>DUSP5</b>  | 2.00 | 0.023 | <b>MTMR10</b> | 1.15  | 0.014 |
| <b>PTPN12</b> | 1.52  | 0.010 | <b>PTPN22</b> | 2.03 | 0.089 | <b>PTPRQ2</b> | 1.20  | 0.138 |
| <b>DUSP16</b> | 1.53  | 0.021 | <b>PTPRS</b>  | 2.15 | 0.003 | <b>DUSP12</b> | 1.21  | 0.107 |
| <b>DUSP23</b> | 1.54  | 0.007 | <b>DUSP23</b> | 2.19 | 0.001 | <b>DUSP10</b> | 1.22  | 0.013 |
| <b>STYX</b>   | 1.55  | 0.030 | <b>DUSP8</b>  | 2.32 | 0.003 | <b>DUSP22</b> | 1.22  | 0.125 |
| <b>TENC1</b>  | 1.58  | 0.009 | <b>DUSP9</b>  | 2.34 | 0.085 | <b>PTPRB</b>  | 1.23  | 0.040 |
| <b>PTPRK</b>  | 1.59  | 0.017 | <b>MTMR3</b>  | 2.44 | 0.001 | <b>SSH2</b>   | 1.23  | 0.104 |
| <b>MTM1</b>   | 1.67  | 0.062 | <b>TNS3</b>   | 2.45 | 0.002 | <b>PTPN2</b>  | 1.25  | 0.055 |
| <b>PTPN14</b> | 1.68  | 0.046 | <b>PTPN12</b> | 2.58 | 0.003 | <b>SSH1</b>   | 1.28  | 0.033 |
| <b>TNS3</b>   | 1.69  | 0.002 | <b>DUSP18</b> | 2.72 | 0.004 | <b>PTPN14</b> | 1.31  | 0.062 |
| <b>MTMR3</b>  | 1.70  | 0.002 | <b>PTPN18</b> | 2.72 | 0.010 | <b>MTMR1</b>  | 1.33  | 0.016 |
| <b>DUSP9</b>  | 1.70  | 0.189 | <b>PTPN7</b>  | 2.82 | ND    | <b>MTMR4</b>  | 1.33  | 0.002 |
| <b>TNS1</b>   | 1.74  | 0.007 | <b>PTPRD</b>  | 2.83 | 0.004 | <b>PTPRO</b>  | 1.34  | 0.031 |
| <b>SSH1</b>   | 1.75  | 0.007 | <b>PTPRU</b>  | 2.92 | 0.002 | <b>PTPN4</b>  | 1.34  | 0.023 |
| <b>DUSP19</b> | 1.85  | 0.007 | <b>TNS1</b>   | 2.96 | 0.000 | <b>PTPRR</b>  | 1.40  | 0.006 |
| <b>MTMR10</b> | 1.98  | 0.002 | <b>PTPN21</b> | 3.33 | 0.054 | <b>MTMR7</b>  | 1.45  | 0.015 |
| <b>CDC14A</b> | 2.26  | 0.009 | <b>DUSP1</b>  | 3.36 | 0.001 | <b>MTMR2</b>  | 1.46  | 0.027 |
| <b>PTPN21</b> | 2.33  | 0.058 | <b>TENC1</b>  | 3.55 | 0.002 | <b>DUSP11</b> | 1.53  | 0.008 |
| <b>PTPRU</b>  | 2.45  | 0.003 | <b>CDC14A</b> | 3.97 | 0.002 | <b>ACP1</b>   | 1.77  | 0.011 |
| <b>PTPRB</b>  | 10.06 | 0.169 | <b>PTPRB</b>  | 8.19 | 0.175 | <b>DUSP19</b> | 1.88  | 0.016 |

ND: Non Determined; GML: Gray Matter lesioned; CGM: Control Gray Matter; NAGM: Normal-appearing Gray Matter
