# Supplementary material for: Identification of VHY/Dusp15 as a Regulator of Oligodendrocyte Differentiation through a Systematic Genomics Approach
Source: PubMed Central journal article supplement (PMC3394735; doi:10.1371/journal.pone.0040457), 2012-07-11
Supplement: pone.0040457.s004.pdf [file pone.0040457.s004.pdf]

Table S4. *PTP genes expression in spinal cord and cerebellum from MOG-induced EAE mice.*  
Differential gene expression of PTP family members in EAE spinal cord and cerebellum lesions

| Mouse spinal cord |                   |        |        |                   |        |        |                   |        |
|-------------------|-------------------|--------|--------|-------------------|--------|--------|-------------------|--------|
|                   | EAE vs SHAM (D14) |        |        | EAE vs SHAM (D17) |        |        | EAE vs SHAM (D28) |        |
|                   | Fold              | Pvalue |        | Fold              | Pvalue |        | Fold              | Pvalue |
| Ptpn20            | -1.59             | 0.055  | Ptprd  | -2.44             | 0.001  | Ptprd  | -2.15             | 0.003  |
| Ptprh             | -1.47             | 0.081  | Dusp15 | -2.40             | 0.001  | Ptprr  | -2.13             | 0.012  |
| Mtmr2             | -1.37             | 0.030  | Ptprn2 | -2.24             | 0.000  | Epm2a  | -1.93             | 0.000  |
| Styxl1            | -1.35             | 0.214  | Ptprr  | -1.94             | 0.006  | Ptpre  | -1.89             | 0.008  |
| Ptpn4             | -1.27             | 0.181  | Ptpn13 | -1.89             | 0.023  | Ptpn13 | -1.82             | 0.003  |
| Ptprr             | -1.26             | 0.168  | Dusp8  | -1.75             | 0.006  | Dusp8  | -1.79             | 0.001  |
| Ptprd             | -1.25             | 0.260  | Ptpn3  | -1.72             | 0.003  | Mtmr7  | -1.79             | 0.006  |
| Ptpre             | -1.20             | 0.232  | Ptpn5  | -1.72             | 0.005  | Ptprn2 | -1.75             | 0.003  |
| Tns1              | -1.14             | 0.293  | Epm2a  | -1.72             | 0.004  | Dusp15 | -1.75             | 0.008  |
| Ptp4a1            | -1.13             | 0.101  | Ptprn  | -1.69             | 0.010  | Ptprm  | -1.74             | 0.020  |
| Dusp15            | -1.09             | 0.422  | Ptpn14 | -1.69             | 0.094  | Ptpn3  | -1.66             | 0.038  |
| Ptpmt1            | -1.05             | 0.164  | Mtmr7  | -1.63             | 0.011  | Dusp26 | -1.66             | 0.009  |
| Dusp8             | -1.04             | 0.455  | Ptprm  | -1.59             | 0.006  | Mtmr2  | -1.59             | 0.015  |
| Epm2a             | -1.04             | 0.129  | Ptprs  | -1.56             | 0.008  | Cdc14b | -1.58             | 0.002  |
| Mtmr7             | -1.03             | 0.208  | Ptpre  | -1.54             | 0.013  | Ptpn5  | -1.57             | 0.013  |
| Ptpdc1            | -1.03             | 0.192  | Tenc1  | -1.52             | 0.012  | Dusp4  | -1.56             | 0.038  |
| Sbf2              | -1.00             | 0.452  | Ptpdc1 | -1.47             | 0.008  | Dusp10 | -1.52             | 0.011  |
| Ptprz1            | 1.00              | 0.356  | Ptprh  | -1.47             | 0.018  | Tenc1  | -1.46             | 0.010  |
| Ptprm             | 1.00              | 0.471  | Ptprz1 | -1.45             | 0.022  | Ptpdc1 | -1.45             | 0.001  |
| Ptprn             | 1.00              | 0.486  | Tns1   | -1.43             | 0.056  | Ptprs  | -1.42             | 0.006  |
| Ptprf             | 1.03              | 0.314  | Mtmr9  | -1.40             | 0.026  | Ptprz1 | -1.41             | 0.002  |
| Dusp1             | 1.04              | 0.215  | Mtmr2  | -1.39             | 0.003  | Ptp4a1 | -1.40             | 0.088  |
| Dusp12            | 1.05              | 0.122  | Sbf1   | -1.31             | 0.038  | Mtmr6  | -1.39             | 0.050  |
| Dusp10            | 1.05              | 0.349  | Ptpn20 | -1.31             | 0.302  | Mtmr4  | -1.38             | 0.010  |
| Mtm1              | 1.05              | 0.311  | Cdc14b | -1.28             | 0.001  | Mtmr10 | -1.35             | 0.028  |
| Dusp19            | 1.05              | 0.316  | Ptprt  | -1.27             | 0.056  | Styxl1 | -1.34             | 0.163  |
| Ptpn3             | 1.06              | 0.370  | Ptpro  | -1.27             | 0.064  | Dusp1  | -1.33             | 0.049  |
| Mtmr10            | 1.07              | 0.021  | Dusp10 | -1.25             | 0.186  | Dusp22 | -1.31             | 0.081  |
| Dusp23            | 1.08              | 0.388  | Ptprg  | -1.23             | 0.133  | Ptprb  | -1.31             | 0.029  |
| Ptprg             | 1.10              | 0.318  | Ptprb  | -1.21             | 0.065  | Ptprg  | -1.30             | 0.010  |
| Ptprn2            | 1.10              | 0.312  | Ptprf  | -1.21             | 0.104  | Mtmr9  | -1.29             | 0.018  |
| Dusp22            | 1.10              | 0.150  | Dusp4  | -1.20             | 0.182  | Ptprn  | -1.27             | 0.001  |
| Acp1              | 1.12              | 0.269  | Ptp4a1 | -1.20             | 0.118  | Sbf1   | -1.25             | 0.087  |
| Dusp14            | 1.12              | 0.347  | Dusp26 | -1.19             | 0.147  | Ptprt  | -1.24             | 0.039  |
| Ptprt             | 1.12              | 0.278  | Mtmr4  | -1.19             | 0.158  | Ptpra  | -1.24             | 0.042  |
| Dusp26            | 1.13              | 0.095  | Ptprk  | -1.15             | 0.153  | Ptprk  | -1.23             | 0.126  |
| Ptpn5             | 1.13              | 0.295  | Dusp12 | -1.14             | 0.128  | Mtmr3  | -1.22             | 0.123  |
| Pten              | 1.14              | 0.167  | Dusp14 | -1.13             | 0.144  | Ptpro  | -1.22             | 0.218  |
| Ptp4a3            | 1.14              | 0.168  | Mtmr6  | -1.13             | 0.215  | Tns1   | -1.17             | 0.244  |
| Dusp18            | 1.15              | 0.129  | Dusp7  | -1.06             | 0.231  | Ssh1   | -1.16             | 0.121  |
| Ptpra             | 1.15              | 0.055  | Dusp22 | -1.05             | 0.321  | Dusp19 | -1.14             | 0.336  |
| Ptprj             | 1.16              | 0.195  | Mtmr10 | -1.01             | 0.481  | Rngtt  | -1.13             | 0.097  |
| Sbf1              | 1.20              | 0.226  | Ptpra  | -1.00             | 0.493  | Dusp12 | -1.12             | 0.156  |
| Dusp4             | 1.21              | 0.093  | Rngtt  | 1.04              | 0.316  | Ptp4a3 | -1.11             | 0.068  |

|               |       |       |               |       |       |               |       |       |
|---------------|-------|-------|---------------|-------|-------|---------------|-------|-------|
| <b>Cdc14b</b> | 1.22  | 0.015 | <b>Mtmr3</b>  | 1.04  | 0.415 | <b>Sbf2</b>   | -1.11 | 0.054 |
| <b>Ptpns</b>  | 1.22  | 0.155 | <b>Ptpn4</b>  | 1.07  | 0.189 | <b>Ptpn21</b> | -1.09 | 0.369 |
| <b>Tenc1</b>  | 1.22  | 0.027 | <b>Ptpmt1</b> | 1.08  | 0.153 | <b>Cdc25b</b> | -1.09 | 0.089 |
| <b>Dusp7</b>  | 1.23  | 0.005 | <b>Ptpn11</b> | 1.08  | 0.303 | <b>Dusp14</b> | -1.09 | 0.082 |
| <b>Ssh1</b>   | 1.23  | 0.198 | <b>Ssh1</b>   | 1.08  | 0.364 | <b>Dusp3</b>  | -1.08 | 0.257 |
| <b>Cdc25b</b> | 1.23  | 0.288 | <b>Dusp18</b> | 1.09  | 0.369 | <b>Ptpn4</b>  | -1.07 | 0.264 |
| <b>Ptpn13</b> | 1.24  | 0.321 | <b>Sbf2</b>   | 1.09  | 0.168 | <b>Dusp7</b>  | -1.05 | 0.242 |
| <b>Mtmr4</b>  | 1.24  | 0.078 | <b>Dusp16</b> | 1.12  | 0.307 | <b>Ptpn11</b> | -1.05 | 0.260 |
| <b>Mtmr1</b>  | 1.24  | 0.019 | <b>Acp1</b>   | 1.19  | 0.140 | <b>Mtmr1</b>  | -1.04 | 0.366 |
| <b>Ptpnb</b>  | 1.25  | 0.051 | <b>Cdc25a</b> | 1.19  | 0.102 | <b>Ptpn9</b>  | -1.03 | 0.428 |
| <b>Rngtt</b>  | 1.28  | 0.010 | <b>Dusp3</b>  | 1.19  | 0.187 | <b>Pten</b>   | 1.01  | 0.473 |
| <b>Mtmr6</b>  | 1.28  | 0.011 | <b>Ptpn23</b> | 1.23  | 0.079 | <b>Ptpnh</b>  | 1.01  | 0.475 |
| <b>Mtmr12</b> | 1.28  | 0.006 | <b>Dusp1</b>  | 1.24  | 0.241 | <b>Ptpmt1</b> | 1.03  | 0.331 |
| <b>Dusp11</b> | 1.29  | 0.054 | <b>Ptpn9</b>  | 1.27  | 0.092 | <b>Dusp16</b> | 1.03  | 0.352 |
| <b>Ptpn9</b>  | 1.29  | 0.012 | <b>Mtmr11</b> | 1.31  | 0.217 | <b>Ptpn14</b> | 1.04  | 0.442 |
| <b>Dusp3</b>  | 1.34  | 0.009 | <b>Ptp4a3</b> | 1.31  | 0.013 | <b>Cdc25a</b> | 1.06  | 0.293 |
| <b>Ptpn23</b> | 1.35  | 0.077 | <b>Dusp11</b> | 1.32  | 0.006 | <b>Ptpn23</b> | 1.11  | 0.212 |
| <b>Mtmr9</b>  | 1.36  | 0.082 | <b>Pten</b>   | 1.38  | 0.043 | <b>Acp1</b>   | 1.13  | 0.250 |
| <b>Ptpn21</b> | 1.38  | 0.065 | <b>Mtmr12</b> | 1.38  | 0.026 | <b>Dusp23</b> | 1.16  | 0.166 |
| <b>Ptpn11</b> | 1.38  | 0.063 | <b>Mtmr1</b>  | 1.40  | 0.025 | <b>Mtmr12</b> | 1.16  | 0.151 |
| <b>Styx</b>   | 1.42  | 0.106 | <b>Dusp23</b> | 1.41  | 0.018 | <b>Mtm1</b>   | 1.19  | 0.226 |
| <b>Ptpro</b>  | 1.45  | 0.028 | <b>Ssh3</b>   | 1.45  | 0.069 | <b>Ssh2</b>   | 1.22  | 0.083 |
| <b>Ptp4a2</b> | 1.46  | 0.086 | <b>Ptp4a2</b> | 1.47  | 0.005 | <b>Mtmr11</b> | 1.22  | 0.170 |
| <b>Mtmr3</b>  | 1.47  | 0.123 | <b>Ptpn21</b> | 1.47  | 0.000 | <b>Dusp11</b> | 1.23  | 0.126 |
| <b>Dusp16</b> | 1.48  | 0.022 | <b>Styx</b>   | 1.49  | 0.009 | <b>Ptpnf</b>  | 1.24  | 0.030 |
| <b>Ptpn14</b> | 1.52  | 0.015 | <b>Mtm1</b>   | 1.55  | 0.031 | <b>Styx</b>   | 1.27  | 0.034 |
| <b>Ssh2</b>   | 1.63  | 0.084 | <b>Styx11</b> | 1.56  | 0.102 | <b>Ptp4a2</b> | 1.39  | 0.017 |
| <b>Dusp2</b>  | 1.63  | 0.115 | <b>Cdc14a</b> | 1.57  | 0.021 | <b>Ssh3</b>   | 1.42  | 0.020 |
| <b>Ptpnk</b>  | 1.63  | 0.009 | <b>Ptpn2</b>  | 1.74  | 0.014 | <b>Ptpn12</b> | 1.49  | 0.052 |
| <b>Cdc25a</b> | 1.69  | 0.008 | <b>Ssh2</b>   | 1.76  | 0.015 | <b>Ptpnj</b>  | 1.54  | 0.039 |
| <b>Ptpn2</b>  | 1.72  | 0.124 | <b>Cdc25b</b> | 2.03  | 0.015 | <b>Ptpn20</b> | 1.68  | 0.071 |
| <b>Cdc14a</b> | 1.72  | 0.125 | <b>Ptpnj</b>  | 2.14  | 0.001 | <b>Dusp18</b> | 1.68  | 0.019 |
| <b>Ssh3</b>   | 1.74  | 0.089 | <b>Ptpn12</b> | 2.20  | 0.011 | <b>Cdc14a</b> | 1.73  | 0.044 |
| <b>Dusp6</b>  | 1.79  | 0.103 | <b>Dusp6</b>  | 2.42  | 0.003 | <b>Dusp6</b>  | 1.74  | 0.052 |
| <b>Ptpn12</b> | 1.81  | 0.078 | <b>Dusp19</b> | 2.75  | 0.015 | <b>Ptpn2</b>  | 1.84  | 0.049 |
| <b>Mtmr11</b> | 2.30  | 0.065 | <b>Dusp5</b>  | 3.22  | 0.004 | <b>Ptpn18</b> | 2.02  | 0.075 |
| <b>Ptpn22</b> | 2.73  | 0.135 | <b>Tns3</b>   | 3.37  | 0.000 | <b>Ptpnq</b>  | 2.36  | 0.076 |
| <b>Tns3</b>   | 2.79  | 0.048 | <b>Cdkn3</b>  | 4.85  | 0.014 | <b>Tns3</b>   | 2.85  | 0.003 |
| <b>Dusp5</b>  | 3.50  | 0.118 | <b>Cdc25c</b> | 5.52  | 0.026 | <b>Dusp5</b>  | 3.16  | 0.033 |
| <b>Ptpnv</b>  | 4.20  | 0.083 | <b>Dusp2</b>  | 6.03  | 0.005 | <b>Dusp2</b>  | 3.27  | 0.004 |
| <b>Cdkn3</b>  | 4.80  | 0.076 | <b>Ptpn1</b>  | 6.20  | 0.000 | <b>Cdc25c</b> | 3.82  | 0.074 |
| <b>Ptpn1</b>  | 4.93  | 0.076 | <b>Ptpn22</b> | 10.69 | 0.001 | <b>Cdkn3</b>  | 3.99  | 0.029 |
| <b>Cdc25c</b> | 5.77  | 0.107 | <b>Ptpnc</b>  | 17.96 | 0.000 | <b>Ptpn1</b>  | 4.09  | 0.003 |
| <b>Ptpnc</b>  | 7.44  | 0.079 | <b>Ptpn6</b>  | 42.75 | 0.000 | <b>Ptpn22</b> | 6.73  | 0.005 |
| <b>Ptpn6</b>  | 10.74 | 0.088 | <b>Ptpn18</b> | ND    | ND    | <b>Ptpnc</b>  | 12.76 | 0.006 |
| <b>Ptpn18</b> | ND    | ND    | <b>Ptpn7</b>  | ND    | ND    | <b>Ptpn7</b>  | 13.42 | 0.013 |
| <b>Ptpn7</b>  | ND    | ND    | <b>Ptpnq</b>  | ND    | ND    | <b>Ptpn6</b>  | 22.60 | 0.002 |
| <b>Ptpnq</b>  | ND    | ND    | <b>Ptpnv</b>  | ND    | ND    | <b>Ptpnv</b>  | ND    | ND    |

ND: Non Determined

**Mouse cerebellum**

|               | <b>EAE vs SHAM (D14)</b> |               |               | <b>EAE vs SHAM (D17)</b> |               |               | <b>EAE s SHAM (D28)</b> |               |
|---------------|--------------------------|---------------|---------------|--------------------------|---------------|---------------|-------------------------|---------------|
|               | <b>Fold</b>              | <b>Pvalue</b> |               | <b>Fold</b>              | <b>Pvalue</b> |               | <b>Fold</b>             | <b>Pvalue</b> |
| <b>Dusp19</b> | -4.22                    | 0.008         | <b>Dusp5</b>  | -2.06                    | 0.009         | <b>Ptpn4</b>  | -1.84                   | 0.184         |
| <b>Ptpn18</b> | -2.23                    | 0.017         | <b>Ptprd</b>  | -1.88                    | 0.010         | <b>Ptprv</b>  | -1.83                   | 0.086         |
| <b>Ptpn4</b>  | -2.10                    | 0.171         | <b>Ptprr</b>  | -1.87                    | 0.033         | <b>Dusp19</b> | -1.50                   | 0.103         |
| <b>Dusp4</b>  | -1.73                    | 0.054         | <b>Ptpn5</b>  | -1.86                    | 0.001         | <b>Ptpn14</b> | -1.35                   | 0.133         |
| <b>Dusp5</b>  | -1.73                    | 0.076         | <b>Ptpro</b>  | -1.85                    | 0.023         | <b>Dusp1</b>  | -1.25                   | 0.155         |
| <b>Cdc25b</b> | -1.68                    | 0.063         | <b>Ptprk</b>  | -1.84                    | 0.010         | <b>Cdkn3</b>  | -1.19                   | 0.247         |
| <b>Dusp1</b>  | -1.63                    | 0.004         | <b>Ptpn13</b> | -1.83                    | 0.031         | <b>Ptprf</b>  | -1.15                   | 0.165         |
| <b>Mtmr3</b>  | -1.58                    | 0.125         | <b>Mtmr2</b>  | -1.79                    | 0.003         | <b>Ptpn18</b> | -1.13                   | 0.278         |
| <b>Dusp2</b>  | -1.47                    | 0.288         | <b>Ptprn2</b> | -1.78                    | 0.004         | <b>Dusp4</b>  | -1.11                   | 0.351         |
| <b>Ptpn23</b> | -1.39                    | 0.176         | <b>Ptprm</b>  | -1.68                    | 0.001         | <b>Dusp18</b> | -1.05                   | 0.403         |
| <b>Ssh3</b>   | -1.38                    | 0.002         | <b>Mtmr7</b>  | -1.67                    | 0.007         | <b>Cdc14b</b> | -1.05                   | 0.386         |
| <b>Ptp4a3</b> | -1.37                    | 0.179         | <b>Ptprs</b>  | -1.65                    | 0.005         | <b>Dusp26</b> | -1.04                   | 0.412         |
| <b>Acp1</b>   | -1.36                    | 0.328         | <b>Rngtt</b>  | -1.64                    | 0.004         | <b>Dusp12</b> | -1.02                   | 0.446         |
| <b>Dusp8</b>  | -1.36                    | 0.116         | <b>Dusp10</b> | -1.63                    | 0.003         | <b>Mtmr3</b>  | -1.02                   | 0.462         |
| <b>Mtmr1</b>  | -1.35                    | 0.113         | <b>Dusp15</b> | -1.58                    | 0.007         | <b>Ssh3</b>   | -1.01                   | 0.374         |
| <b>Ptprb</b>  | -1.35                    | 0.366         | <b>Mtmr11</b> | -1.54                    | 0.031         | <b>Tenc1</b>  | -1.00                   | 0.481         |
| <b>Ptprn2</b> | -1.35                    | 0.267         | <b>Sbf1</b>   | -1.52                    | 0.036         | <b>Cdc25b</b> | 1.01                    | 0.484         |
| <b>Ptprj</b>  | -1.35                    | 0.095         | <b>Dusp8</b>  | -1.51                    | 0.001         | <b>Dusp5</b>  | 1.02                    | 0.449         |
| <b>Ptprd</b>  | -1.32                    | 0.095         | <b>Mtmr9</b>  | -1.51                    | 0.004         | <b>Ptpn9</b>  | 1.02                    | 0.411         |
| <b>Ptprr</b>  | -1.31                    | 0.155         | <b>Dusp1</b>  | -1.48                    | 0.012         | <b>Tns3</b>   | 1.03                    | 0.447         |
| <b>Mtmr4</b>  | -1.29                    | 0.120         | <b>Mtmr4</b>  | -1.48                    | 0.002         | <b>Ptp4a1</b> | 1.03                    | 0.399         |
| <b>Ptprm</b>  | -1.29                    | 0.258         | <b>Mtmr6</b>  | -1.47                    | 0.003         | <b>Ptp4a3</b> | 1.03                    | 0.364         |
| <b>Ptpn9</b>  | -1.28                    | 0.041         | <b>Ptprn</b>  | -1.46                    | 0.017         | <b>Tns1</b>   | 1.04                    | 0.292         |
| <b>Ptpn22</b> | -1.28                    | 0.239         | <b>Epm2a</b>  | -1.44                    | 0.071         | <b>Dusp22</b> | 1.05                    | 0.342         |
| <b>Mtmr12</b> | -1.25                    | 0.153         | <b>Dusp4</b>  | -1.42                    | 0.080         | <b>Dusp3</b>  | 1.06                    | 0.056         |
| <b>Ptpra</b>  | -1.24                    | 0.264         | <b>Dusp18</b> | -1.42                    | 0.071         | <b>Dusp8</b>  | 1.06                    | 0.322         |
| <b>Mtmr10</b> | -1.24                    | 0.058         | <b>Ssh1</b>   | -1.41                    | 0.020         | <b>Ptpn22</b> | 1.07                    | 0.287         |
| <b>Dusp12</b> | -1.24                    | 0.131         | <b>Tenc1</b>  | -1.40                    | 0.063         | <b>Dusp14</b> | 1.07                    | 0.204         |
| <b>Sbf2</b>   | -1.24                    | 0.289         | <b>Ptpn14</b> | -1.38                    | 0.111         | <b>Ptpra</b>  | 1.07                    | 0.156         |
| <b>Cdc14b</b> | -1.22                    | 0.243         | <b>Ptpn9</b>  | -1.37                    | 0.031         | <b>Ssh1</b>   | 1.07                    | 0.207         |
| <b>Ptpn14</b> | -1.19                    | 0.498         | <b>Mtmr12</b> | -1.36                    | 0.078         | <b>Ptpmt1</b> | 1.07                    | 0.243         |
| <b>Ptprz1</b> | -1.19                    | 0.328         | <b>Ptprb</b>  | -1.35                    | 0.037         | <b>Mtmr4</b>  | 1.08                    | 0.281         |
| <b>Sbf1</b>   | -1.19                    | 0.399         | <b>Ptpdc1</b> | -1.29                    | 0.020         | <b>Ptprn2</b> | 1.08                    | 0.350         |
| <b>Dusp3</b>  | -1.18                    | 0.452         | <b>Ptpra</b>  | -1.28                    | 0.007         | <b>Dusp10</b> | 1.09                    | 0.215         |
| <b>Epm2a</b>  | -1.18                    | 0.376         | <b>Pten</b>   | -1.26                    | 0.001         | <b>Ptprd</b>  | 1.09                    | 0.126         |
| <b>Pten</b>   | -1.17                    | 0.219         | <b>Dusp7</b>  | -1.26                    | 0.076         | <b>Ptpn23</b> | 1.09                    | 0.233         |
| <b>Ptprn</b>  | -1.17                    | 0.415         | <b>Dusp11</b> | -1.25                    | 0.018         | <b>Ptpn5</b>  | 1.09                    | 0.346         |
| <b>Mtmr7</b>  | -1.16                    | 0.410         | <b>Dusp16</b> | -1.24                    | 0.009         | <b>Mtmr6</b>  | 1.09                    | 0.291         |
| <b>Dusp10</b> | -1.15                    | 0.479         | <b>Dusp12</b> | -1.24                    | 0.002         | <b>Ptprr</b>  | 1.09                    | 0.198         |
| <b>Ptpmt1</b> | -1.14                    | 0.061         | <b>Ptpn23</b> | -1.21                    | 0.166         | <b>Dusp15</b> | 1.10                    | 0.187         |
| <b>Mtmr2</b>  | -1.12                    | 0.016         | <b>Ptprz1</b> | -1.20                    | 0.058         | <b>Dusp11</b> | 1.10                    | 0.175         |
| <b>Ptpn11</b> | -1.12                    | 0.467         | <b>Ptprg</b>  | -1.20                    | 0.009         | <b>Dusp16</b> | 1.10                    | 0.199         |
| <b>Ptprs</b>  | -1.12                    | 0.478         | <b>Mtmr3</b>  | -1.19                    | 0.088         | <b>Ptprz1</b> | 1.10                    | 0.106         |
| <b>Ptpn3</b>  | -1.12                    | 0.411         | <b>Dusp26</b> | -1.19                    | 0.185         | <b>Ptpn11</b> | 1.10                    | 0.173         |
| <b>Ssh1</b>   | -1.11                    | 0.429         | <b>Sbf2</b>   | -1.18                    | 0.006         | <b>Mtmr1</b>  | 1.11                    | 0.148         |
| <b>Dusp11</b> | -1.11                    | 0.432         | <b>Ssh2</b>   | -1.17                    | 0.068         | <b>Ptprb</b>  | 1.11                    | 0.183         |
| <b>Dusp16</b> | -1.11                    | 0.430         | <b>Mtmr10</b> | -1.15                    | 0.138         | <b>Ssh2</b>   | 1.12                    | 0.270         |

|               |       |       |               |       |       |               |      |       |
|---------------|-------|-------|---------------|-------|-------|---------------|------|-------|
| <b>Ptprg</b>  | -1.10 | 0.464 | <b>Dusp6</b>  | -1.14 | 0.158 | <b>Ptpre</b>  | 1.12 | 0.343 |
| <b>Rngtt</b>  | -1.10 | 0.409 | <b>Ptp4a1</b> | -1.14 | 0.098 | <b>Sbf1</b>   | 1.12 | 0.228 |
| <b>Dusp15</b> | -1.07 | 0.374 | <b>Dusp3</b>  | -1.13 | 0.209 | <b>Ptpro</b>  | 1.12 | 0.323 |
| <b>Ptprt</b>  | -1.06 | 0.300 | <b>Dusp22</b> | -1.13 | 0.097 | <b>Mtmr2</b>  | 1.12 | 0.037 |
| <b>Mtmr6</b>  | -1.04 | 0.434 | <b>Cdc25a</b> | -1.12 | 0.209 | <b>Mtmr12</b> | 1.13 | 0.126 |
| <b>Dusp22</b> | -1.03 | 0.338 | <b>Ptpre</b>  | -1.10 | 0.326 | <b>Ptpn1</b>  | 1.13 | 0.237 |
| <b>Ptpn7</b>  | ND    | ND    | <b>Ptpn21</b> | -1.09 | 0.310 | <b>Epm2a</b>  | 1.13 | 0.300 |
| <b>Ptpre</b>  | 1.01  | 0.261 | <b>Mtmr1</b>  | -1.08 | 0.277 | <b>Ptpn2</b>  | 1.13 | 0.191 |
| <b>Ptpn21</b> | 1.01  | 0.304 | <b>Ptp4a2</b> | -1.07 | 0.006 | <b>Ptprs</b>  | 1.13 | 0.174 |
| <b>Dusp26</b> | 1.01  | 0.351 | <b>Ptpn12</b> | -1.07 | 0.318 | <b>Ptprn</b>  | 1.13 | 0.205 |
| <b>Ssh2</b>   | 1.01  | 0.277 | <b>Ptpn3</b>  | -1.05 | 0.417 | <b>Pten</b>   | 1.14 | 0.044 |
| <b>Ptpn12</b> | 1.01  | 0.299 | <b>Ptprt</b>  | -1.05 | 0.349 | <b>Ptprt</b>  | 1.14 | 0.243 |
| <b>Mtmr9</b>  | 1.02  | 0.217 | <b>Ptpn2</b>  | -1.03 | 0.436 | <b>Ptpn12</b> | 1.14 | 0.057 |
| <b>Ptpn13</b> | 1.03  | 0.443 | <b>Acp1</b>   | -1.03 | 0.310 | <b>Mtmr7</b>  | 1.16 | 0.019 |
| <b>Ptpn2</b>  | 1.07  | 0.371 | <b>Ptprq</b>  | -1.01 | 0.479 | <b>Ptpre</b>  | 1.17 | 0.159 |
| <b>Ptpn5</b>  | 1.07  | 0.321 | <b>Ptpmt1</b> | -1.00 | 0.488 | <b>Acp1</b>   | 1.17 | 0.010 |
| <b>Ptp4a1</b> | 1.08  | 0.326 | <b>Ptprj</b>  | 1.00  | 0.500 | <b>Ptp4a2</b> | 1.17 | 0.063 |
| <b>Dusp23</b> | 1.08  | 0.213 | <b>Ssh3</b>   | 1.01  | 0.474 | <b>Rngtt</b>  | 1.17 | 0.076 |
| <b>Tns1</b>   | 1.11  | 0.279 | <b>Ptp4a3</b> | 1.01  | 0.443 | <b>Sbf2</b>   | 1.18 | 0.015 |
| <b>Dusp18</b> | 1.13  | 0.160 | <b>Ptpn11</b> | 1.02  | 0.400 | <b>Ptprk</b>  | 1.19 | 0.326 |
| <b>Dusp7</b>  | 1.13  | 0.184 | <b>Styx</b>   | 1.05  | 0.403 | <b>Mtm1</b>   | 1.21 | 0.046 |
| <b>Cdc25a</b> | 1.13  | 0.222 | <b>Cdc14b</b> | 1.06  | 0.280 | <b>Ptprm</b>  | 1.21 | 0.034 |
| <b>Ptp4a2</b> | 1.17  | 0.003 | <b>Ptpn22</b> | 1.06  | 0.368 | <b>Mtmr10</b> | 1.23 | 0.008 |
| <b>Dusp14</b> | 1.20  | 0.275 | <b>Ptprv</b>  | 1.08  | 0.426 | <b>Cdc25a</b> | 1.23 | 0.162 |
| <b>Mtm1</b>   | 1.21  | 0.031 | <b>Dusp14</b> | 1.11  | 0.063 | <b>Dusp6</b>  | 1.25 | 0.090 |
| <b>Mtmr11</b> | 1.22  | 0.297 | <b>Dusp23</b> | 1.14  | 0.146 | <b>Ptprh</b>  | 1.26 | 0.148 |
| <b>Ptprk</b>  | 1.23  | 0.169 | <b>Tns1</b>   | 1.16  | 0.023 | <b>Ptprg</b>  | 1.26 | 0.116 |
| <b>Dusp6</b>  | 1.24  | 0.159 | <b>Ptprf</b>  | 1.20  | 0.006 | <b>Ptprj</b>  | 1.27 | 0.029 |
| <b>Ptpdc1</b> | 1.28  | 0.211 | <b>Ptprh</b>  | 1.23  | 0.296 | <b>Dusp7</b>  | 1.27 | 0.030 |
| <b>Styx</b>   | 1.29  | 0.215 | <b>Mtm1</b>   | 1.28  | 0.004 | <b>Dusp23</b> | 1.28 | 0.014 |
| <b>Ptprf</b>  | 1.32  | 0.062 | <b>Cdc25c</b> | 1.33  | 0.075 | <b>Ptpn3</b>  | 1.28 | 0.090 |
| <b>Ptprv</b>  | 1.34  | 0.151 | <b>Cdc14a</b> | 1.34  | 0.071 | <b>Ptpn6</b>  | 1.28 | 0.098 |
| <b>Tenc1</b>  | 1.42  | 0.136 | <b>Tns3</b>   | 1.40  | 0.010 | <b>Styx</b>   | 1.29 | 0.106 |
| <b>Ptprh</b>  | 1.49  | 0.258 | <b>Ptpn4</b>  | 1.45  | 0.038 | <b>Mtmr9</b>  | 1.29 | 0.074 |
| <b>Ptpro</b>  | 1.52  | 0.126 | <b>Ptpn1</b>  | 1.62  | 0.032 | <b>Ptpn21</b> | 1.30 | 0.003 |
| <b>Ptpn20</b> | 1.53  | 0.288 | <b>Styxl1</b> | 2.07  | 0.145 | <b>Mtmr11</b> | 1.36 | 0.102 |
| <b>Cdc14a</b> | 1.60  | 0.149 | <b>Ptpn18</b> | 2.36  | 0.161 | <b>Cdc14a</b> | 1.38 | 0.033 |
| <b>Cdc25c</b> | 1.77  | 0.042 | <b>Ptpn20</b> | 2.53  | 0.052 | <b>Ptpn13</b> | 1.40 | 0.113 |
| <b>Ptpn1</b>  | 1.78  | 0.151 | <b>Cdkn3</b>  | 3.08  | 0.020 | <b>Styxl1</b> | 1.40 | 0.012 |
| <b>Tns3</b>   | 1.87  | 0.118 | <b>Ptpn7</b>  | 3.18  | 0.054 | <b>Ptpn7</b>  | 1.42 | 0.279 |
| <b>Ptprq</b>  | 2.18  | 0.276 | <b>Cdc25b</b> | 3.63  | 0.000 | <b>Ptpdc1</b> | 1.50 | 0.024 |
| <b>Styxl1</b> | 2.24  | 0.196 | <b>Ptpre</b>  | 3.78  | 0.010 | <b>Ptprq</b>  | 2.14 | 0.307 |
| <b>Cdkn3</b>  | 2.48  | 0.07  | <b>Ptpn6</b>  | 7.27  | 0.01  | <b>Cdc25c</b> | 2.69 | 0.24  |
| <b>Ptpre</b>  | 4.17  | 0.035 | <b>Dusp2</b>  | 18.72 | 0.053 | <b>Dusp2</b>  | 3.28 | 0.070 |
| <b>Ptpn6</b>  | 5.42  | 0.046 | <b>Dusp19</b> | 30.01 | 0.002 | <b>Ptpn20</b> | 5.12 | 0.092 |

ND: Non Determined
