# Supplementary material for: Identification of VHY/Dusp15 as a Regulator of Oligodendrocyte Differentiation through a Systematic Genomics Approach
Source: PubMed Central journal article supplement (PMC3394735; doi:10.1371/journal.pone.0040457), 2012-07-11
Supplement: pone.0040457.s005.pdf [file pone.0040457.s005.pdf]

Table S5. *PTP gene expression during OL differentiation in mouse mixed cortical cultures*  
Differential gene expression of PTP family members in mixed cortical culture undergoing OL differentiation

|               | DIV8/DIV5 |        |               | DIV12/DIV5 |        |               | DIV15/DIV5 |        |
|---------------|-----------|--------|---------------|------------|--------|---------------|------------|--------|
|               | Fold      | Pvalue |               | Fold       | Pvalue |               | Fold       | Pvalue |
| <b>Mtmr12</b> | -4.99     | 0.036  | <b>Mtmr11</b> | -7.41      | 0.054  | <b>Dusp2</b>  | -8.45      | 0.002  |
| <b>Cdc25c</b> | -3.75     | 0.070  | <b>Dusp4</b>  | -4.64      | 0.016  | <b>Ptpro</b>  | -4.27      | 0.013  |
| <b>Ptpn23</b> | -3.33     | 0.022  | <b>Dusp2</b>  | -4.18      | 0.004  | <b>Ssh1</b>   | -2.71      | 0.064  |
| <b>Ptpn14</b> | -2.11     | 0.026  | <b>Cdc25c</b> | -4.09      | 0.032  | <b>Dusp8</b>  | -2.50      | 0.018  |
| <b>Ptpn6</b>  | -2.00     | ND     | <b>Ptpn6</b>  | -3.36      | ND     | <b>Cdc25c</b> | -2.27      | 0.022  |
| <b>Dusp4</b>  | -1.95     | 0.104  | <b>Ptpn5</b>  | -3.29      | 0.010  | <b>Ptp4a1</b> | -2.11      | 0.016  |
| <b>Dusp1</b>  | -1.75     | 0.018  | <b>Ptprz1</b> | -3.00      | 0.015  | <b>Ptpn6</b>  | -1.95      | ND     |
| <b>Ptprk</b>  | -1.57     | 0.045  | <b>Ptpro</b>  | -2.85      | 0.008  | <b>Styx</b>   | -1.84      | 0.000  |
| <b>Ssh1</b>   | -1.40     | 0.188  | <b>Ptpn13</b> | -2.59      | 0.018  | <b>Ssh2</b>   | -1.81      | 0.034  |
| <b>Ptpro</b>  | -1.28     | 0.147  | <b>Mtmr12</b> | -2.53      | 0.093  | <b>Cdc25a</b> | -1.73      | 0.059  |
| <b>Tns1</b>   | -1.25     | 0.206  | <b>Tenc1</b>  | -2.49      | 0.028  | <b>Ptpn23</b> | -1.71      | 0.045  |
| <b>Ptprm</b>  | -1.19     | 0.222  | <b>Ptprd</b>  | -2.43      | 0.013  | <b>Dusp12</b> | -1.71      | 0.060  |
| <b>Ptpn5</b>  | -1.12     | 0.306  | <b>Ptpn9</b>  | -2.26      | 0.040  | <b>Rngtt</b>  | -1.71      | 0.044  |
| <b>Dusp8</b>  | -1.11     | 0.374  | <b>Dusp8</b>  | -2.26      | 0.016  | <b>Ptprh</b>  | -1.69      | 0.108  |
| <b>Dusp12</b> | -1.11     | 0.228  | <b>Mtmr6</b>  | -2.24      | 0.023  | <b>Sbf2</b>   | -1.54      | 0.075  |
| <b>Mtmr2</b>  | -1.09     | 0.278  | <b>Ptpn12</b> | -2.11      | 0.024  | <b>Dusp1</b>  | -1.50      | 0.003  |
| <b>Cdc25a</b> | -1.09     | 0.303  | <b>Dusp18</b> | -2.07      | 0.011  | <b>Ptpn5</b>  | -1.46      | 0.019  |
| <b>Sbf2</b>   | -1.08     | 0.225  | <b>Rngtt</b>  | -2.00      | 0.049  | <b>Ptprd</b>  | -1.46      | 0.067  |
| <b>Ptprz1</b> | -1.07     | 0.312  | <b>Mtmr2</b>  | -1.93      | 0.059  | <b>Mtmr4</b>  | -1.40      | 0.161  |
| <b>Ptpn4</b>  | -1.07     | 0.330  | <b>Dusp12</b> | -1.90      | 0.040  | <b>Ptpn9</b>  | -1.38      | 0.137  |
| <b>Ssh2</b>   | -1.05     | 0.439  | <b>Ptpn22</b> | -1.81      | 0.025  | <b>Ptpn21</b> | -1.31      | 0.112  |
| <b>Ptpn9</b>  | -1.03     | 0.447  | <b>Ssh1</b>   | -1.79      | 0.134  | <b>Dusp22</b> | -1.30      | 0.220  |
| <b>Ptpn12</b> | -1.02     | 0.433  | <b>Cdc25a</b> | -1.65      | 0.071  | <b>Cdkn3</b>  | -1.29      | 0.014  |
| <b>Cdc25b</b> | 1.02      | 0.307  | <b>Dusp6</b>  | -1.62      | 0.042  | <b>Ptpn12</b> | -1.26      | 0.175  |
| <b>Dusp16</b> | 1.02      | 0.436  | <b>Mtmr4</b>  | -1.59      | 0.084  | <b>Dusp4</b>  | -1.26      | 0.164  |
| <b>Mtmr1</b>  | 1.03      | 0.250  | <b>Ssh2</b>   | -1.56      | 0.012  | <b>Cdc25b</b> | -1.24      | 0.162  |
| <b>Ptpn1</b>  | 1.05      | 0.193  | <b>Sbf2</b>   | -1.55      | 0.080  | <b>Ptprs</b>  | -1.23      | 0.114  |
| <b>Dusp2</b>  | 1.06      | 0.314  | <b>Ptpn1</b>  | -1.43      | 0.013  | <b>Mtmr9</b>  | -1.21      | 0.192  |
| <b>Rngtt</b>  | 1.08      | 0.433  | <b>Ptpn11</b> | -1.31      | 0.120  | <b>Dusp11</b> | -1.20      | 0.192  |
| <b>Dusp18</b> | 1.09      | 0.251  | <b>Acp1</b>   | -1.31      | 0.080  | <b>Ptprz1</b> | -1.16      | 0.127  |
| <b>Ptp4a2</b> | 1.11      | 0.192  | <b>Ptprk</b>  | -1.31      | 0.156  | <b>Ptprj</b>  | -1.11      | 0.255  |
| <b>Dusp22</b> | 1.11      | 0.310  | <b>Ptp4a1</b> | -1.27      | 0.110  | <b>Mtmr6</b>  | -1.06      | 0.187  |
| <b>Mtmr6</b>  | 1.12      | 0.330  | <b>Styx</b>   | -1.26      | 0.016  | <b>Ptpn1</b>  | 1.05       | 0.407  |
| <b>Ptprh</b>  | 1.16      | 0.104  | <b>Ptprh</b>  | -1.24      | 0.405  | <b>Ptp4a2</b> | 1.05       | 0.295  |
| <b>Cdc14b</b> | 1.17      | 0.323  | <b>Ptprm</b>  | -1.23      | 0.084  | <b>Acp1</b>   | 1.07       | 0.218  |
| <b>Dusp10</b> | 1.19      | 0.274  | <b>Dusp11</b> | -1.22      | 0.021  | <b>Dusp18</b> | 1.09       | 0.427  |
| <b>Ptpmt1</b> | 1.19      | 0.079  | <b>Cdkn3</b>  | -1.19      | 0.230  | <b>Mtmr3</b>  | 1.09       | 0.071  |
| <b>Acp1</b>   | 1.20      | 0.283  | <b>Ptpn23</b> | -1.15      | 0.247  | <b>Ptpra</b>  | 1.10       | 0.233  |
| <b>Ptprs</b>  | 1.23      | 0.244  | <b>Ptp4a2</b> | -1.06      | 0.319  | <b>Ptpn4</b>  | 1.10       | 0.148  |
| <b>Ptpra</b>  | 1.24      | 0.198  | <b>Dusp22</b> | -1.05      | 0.450  | <b>Cdc14a</b> | 1.11       | 0.339  |
| <b>Ptprr</b>  | 1.27      | 0.149  | <b>Mtmr9</b>  | -1.05      | 0.398  | <b>Ptpdc1</b> | 1.12       | 0.126  |
| <b>Dusp11</b> | 1.28      | 0.030  | <b>Ptpn21</b> | -1.05      | 0.365  | <b>Pten</b>   | 1.19       | 0.106  |
| <b>Mtmr9</b>  | 1.29      | 0.183  | <b>Cdc14a</b> | -1.01      | 0.482  | <b>Dusp10</b> | 1.19       | 0.214  |
| <b>Styx</b>   | 1.29      | 0.077  | <b>Ptpra</b>  | -1.00      | 0.496  | <b>Ptpre</b>  | 1.20       | 0.294  |
| <b>Ptprj</b>  | 1.29      | 0.160  | <b>Ptprs</b>  | 1.03       | 0.498  | <b>Ptprg</b>  | 1.23       | 0.159  |
| <b>Ptprd</b>  | 1.30      | 0.238  | <b>Mtm1</b>   | 1.04       | 0.436  | <b>Dusp7</b>  | 1.25       | 0.188  |
| <b>Mtmr4</b>  | 1.33      | 0.007  | <b>Ptpn20</b> | 1.05       | 0.404  | <b>Dusp26</b> | 1.26       | 0.018  |
| <b>Ptpn21</b> | 1.35      | 0.104  | <b>Mtmr3</b>  | 1.06       | 0.417  | <b>Ptprf</b>  | 1.26       | 0.257  |
| <b>Ptpn11</b> | 1.37      | 0.194  | <b>Ptprj</b>  | 1.07       | 0.375  | <b>Ptprm</b>  | 1.27       | 0.169  |

|               |      |       |               |       |       |               |       |       |
|---------------|------|-------|---------------|-------|-------|---------------|-------|-------|
| <b>Ptpn20</b> | 1.47 | 0.142 | <b>Dusp1</b>  | 1.09  | 0.137 | <b>Mtmr12</b> | 1.36  | 0.010 |
| <b>Mtmr3</b>  | 1.47 | 0.040 | <b>Pten</b>   | 1.20  | 0.105 | <b>Ptpn11</b> | 1.39  | 0.076 |
| <b>Dusp7</b>  | 1.48 | 0.094 | <b>Ptp4a3</b> | 1.22  | 0.307 | <b>Ptprn2</b> | 1.52  | 0.160 |
| <b>Mtmr11</b> | 1.49 | 0.053 | <b>Tns1</b>   | 1.22  | 0.073 | <b>Ptp4a3</b> | 1.59  | 0.131 |
| <b>Ptprg</b>  | 1.52 | 0.088 | <b>Ptprg</b>  | 1.23  | 0.258 | <b>Ptprk</b>  | 1.65  | 0.346 |
| <b>Dusp6</b>  | 1.52 | 0.031 | <b>Dusp7</b>  | 1.24  | 0.148 | <b>Ptpmt1</b> | 1.66  | 0.002 |
| <b>Ptpn18</b> | 1.55 | 0.011 | <b>Ptpn4</b>  | 1.28  | 0.148 | <b>Tenc1</b>  | 1.66  | 0.147 |
| <b>Dusp23</b> | 1.55 | 0.117 | <b>Ptprf</b>  | 1.28  | 0.200 | <b>Mtmr2</b>  | 1.66  | 0.175 |
| <b>Pten</b>   | 1.62 | 0.019 | <b>Mtmr1</b>  | 1.31  | 0.072 | <b>Mtmr1</b>  | 1.77  | 0.041 |
| <b>Dusp3</b>  | 1.63 | 0.091 | <b>Dusp16</b> | 1.34  | 0.047 | <b>Sbf1</b>   | 1.88  | 0.002 |
| <b>Ptpn22</b> | 1.67 | 0.003 | <b>Sbf1</b>   | 1.35  | 0.123 | <b>Dusp6</b>  | 2.08  | 0.195 |
| <b>Cdkn3</b>  | 1.69 | 0.076 | <b>Dusp10</b> | 1.40  | 0.139 | <b>Dusp16</b> | 2.10  | 0.017 |
| <b>Ptp4a3</b> | 1.69 | 0.028 | <b>Ptpdc1</b> | 1.42  | 0.132 | <b>Ptpn14</b> | 2.33  | 0.007 |
| <b>Ptp4a1</b> | 1.77 | 0.042 | <b>Ptprt</b>  | 1.42  | 0.010 | <b>Ptprt</b>  | 2.50  | 0.007 |
| <b>Cdc14a</b> | 1.77 | 0.023 | <b>Ptpn18</b> | 1.50  | 0.114 | <b>Dusp23</b> | 2.52  | 0.055 |
| <b>Ptprn2</b> | 1.84 | 0.167 | <b>Ptpr</b>   | 1.52  | 0.089 | <b>Mtmr7</b>  | 2.55  | 0.020 |
| <b>Ptpre</b>  | 1.89 | 0.023 | <b>Ptpmt1</b> | 1.59  | 0.000 | <b>Mtmr11</b> | 2.85  | 0.004 |
| <b>Sbf1</b>   | 1.97 | 0.066 | <b>Ptpn2</b>  | 1.89  | 0.193 | <b>Ptpr</b>   | 2.91  | 0.036 |
| <b>Dusp26</b> | 1.97 | 0.040 | <b>Dusp26</b> | 2.07  | 0.016 | <b>Ssh3</b>   | 3.02  | 0.010 |
| <b>Ptpn2</b>  | 1.99 | 0.041 | <b>Cdc25b</b> | 2.09  | 0.039 | <b>Ptpn13</b> | 3.12  | 0.004 |
| <b>Ptprt</b>  | 2.22 | 0.020 | <b>Ptpn14</b> | 2.14  | 0.068 | <b>Ptpn2</b>  | 3.32  | 0.138 |
| <b>Tenc1</b>  | 2.38 | 0.084 | <b>Dusp3</b>  | 2.17  | 0.017 | <b>Dusp3</b>  | 3.37  | 0.003 |
| <b>Ptpdc1</b> | 2.39 | 0.022 | <b>Mtmr7</b>  | 2.38  | 0.022 | <b>Tns1</b>   | 3.54  | 0.004 |
| <b>Ptprf</b>  | 2.59 | 0.074 | <b>Ptpre</b>  | 2.44  | 0.009 | <b>Dusp14</b> | 3.58  | 0.001 |
| <b>Ptpn13</b> | 2.75 | 0.027 | <b>Ptprn2</b> | 2.46  | 0.043 | <b>Ptpn22</b> | 3.67  | 0.213 |
| <b>Dusp14</b> | 2.83 | 0.065 | <b>Dusp23</b> | 2.71  | 0.003 | <b>Ptpn18</b> | 3.95  | 0.081 |
| <b>Mtmr7</b>  | 3.05 | 0.002 | <b>Dusp14</b> | 2.98  | 0.026 | <b>Tns3</b>   | 4.13  | 0.055 |
| <b>Tns3</b>   | 3.36 | 0.019 | <b>Cdc14b</b> | 3.99  | 0.025 | <b>Cdc14b</b> | 4.69  | 0.026 |
| <b>Ptprn</b>  | 3.68 | 0.026 | <b>Ptprn</b>  | 4.01  | 0.027 | <b>Epm2a</b>  | 5.52  | 0.012 |
| <b>Ssh3</b>   | 3.82 | 0.002 | <b>Ssh3</b>   | 4.40  | 0.015 | <b>Mtm1</b>   | 5.60  | 0.126 |
| <b>Epm2a</b>  | 3.86 | 0.044 | <b>Tns3</b>   | 4.60  | 0.006 | <b>Ptprn</b>  | 6.93  | 0.026 |
| <b>Mtm1</b>   | 3.89 | 0.007 | <b>Dusp5</b>  | 4.65  | 0.094 | <b>Dusp15</b> | 7.71  | 0.076 |
| <b>Dusp15</b> | 4.52 | 0.007 | <b>Dusp15</b> | 5.41  | 0.015 | <b>Dusp5</b>  | 11.28 | 0.033 |
| <b>Dusp5</b>  | 9.90 | 0.083 | <b>Epm2a</b>  | 10.01 | 0.015 | <b>Dusp19</b> | ND    | ND    |
| <b>Dusp19</b> | ND   | ND    | <b>Dusp19</b> | ND    | ND    | <b>Mtmr10</b> | ND    | ND    |
| <b>Mtmr10</b> | ND   | ND    | <b>Mtmr10</b> | ND    | ND    | <b>Ptpn20</b> | ND    | ND    |
| <b>Ptpn3</b>  | ND   | ND    | <b>Ptpn3</b>  | ND    | ND    | <b>Ptpn3</b>  | ND    | ND    |
| <b>Ptpn7</b>  | ND   | ND    | <b>Ptpn7</b>  | ND    | ND    | <b>Ptpn7</b>  | ND    | ND    |
| <b>Ptprb</b>  | ND   | ND    | <b>Ptprb</b>  | ND    | ND    | <b>Ptprb</b>  | ND    | ND    |
| <b>Ptprc</b>  | ND   | ND    | <b>Ptprc</b>  | ND    | ND    | <b>Ptprc</b>  | ND    | ND    |
| <b>Ptprq</b>  | ND   | ND    | <b>Ptprq</b>  | ND    | ND    | <b>Ptprq</b>  | ND    | ND    |
| <b>Ptprv</b>  | ND   | ND    | <b>Ptprv</b>  | ND    | ND    | <b>Ptprv</b>  | ND    | ND    |
| <b>Styxl1</b> | ND   | ND    | <b>Styxl1</b> | ND    | ND    | <b>Styxl1</b> | ND    | ND    |

ND: Non Determined
